# Supplementary material
Source: Springer Nature journal article supplement (https://www.springermedizin.de/resource/supplementary/12889_2011_3487_MOESM3_ESM.pdf/9489168)

Men, high-risk countries

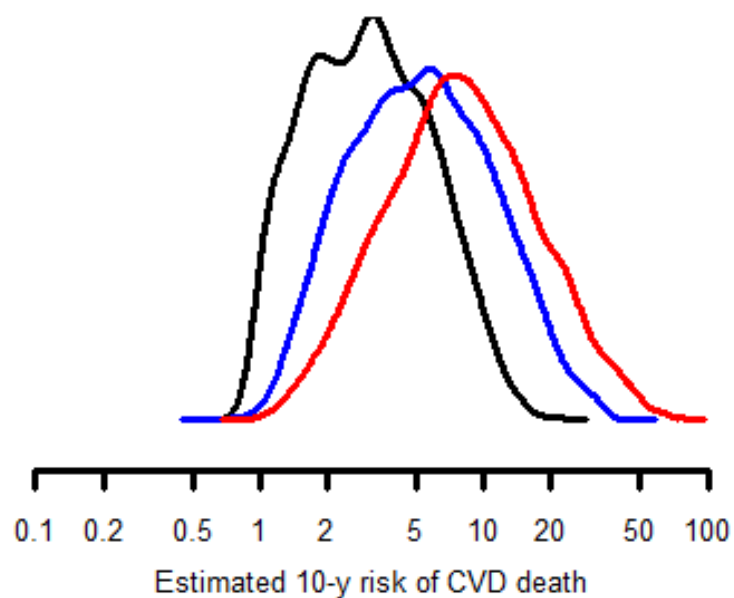

Women, high-risk countries

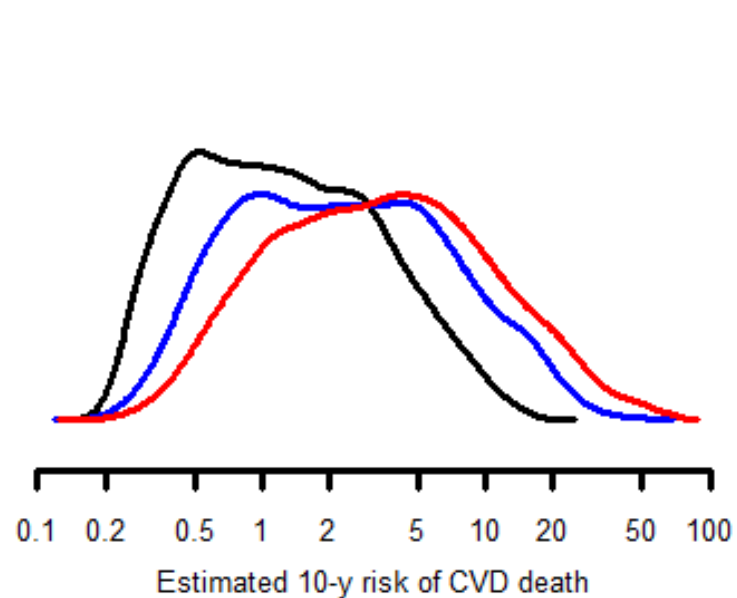

Men, low-risk countries

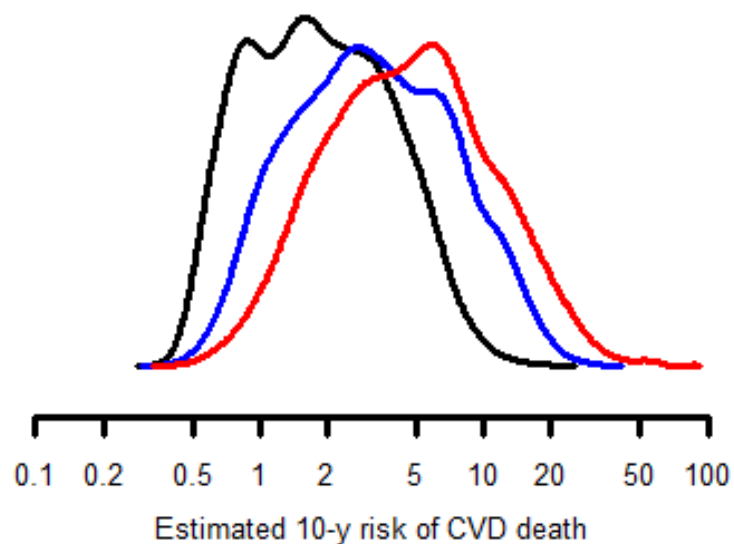

Women, low-risk countries

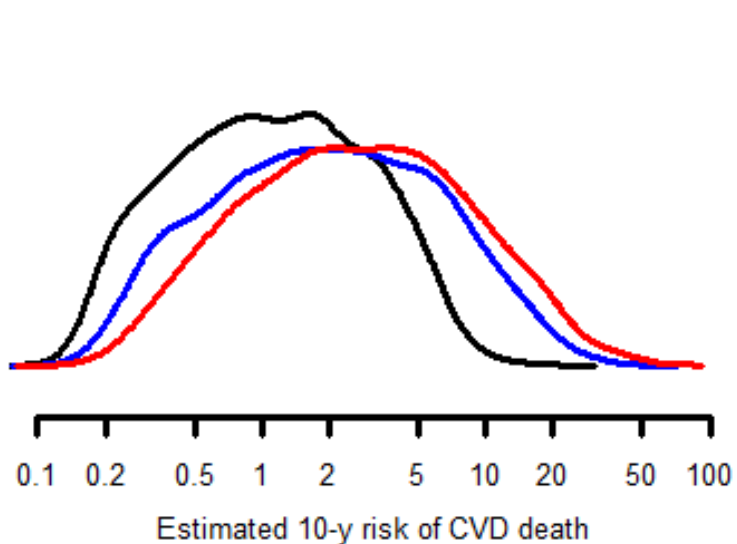

Supplement: MOESM3 [file 9489168]
